# Supplementary material for: Linkage and Association Mapping for Two Major Traits Used in the Maritime Pine Breeding Program: Height Growth and Stem Straightness
Source: PubMed Central journal article supplement (PMC5091878; doi:10.1371/journal.pone.0165323), 2016-11-02
Supplement: pone.0165323.s005.pdf [file pone.0165323.s005.pdf]

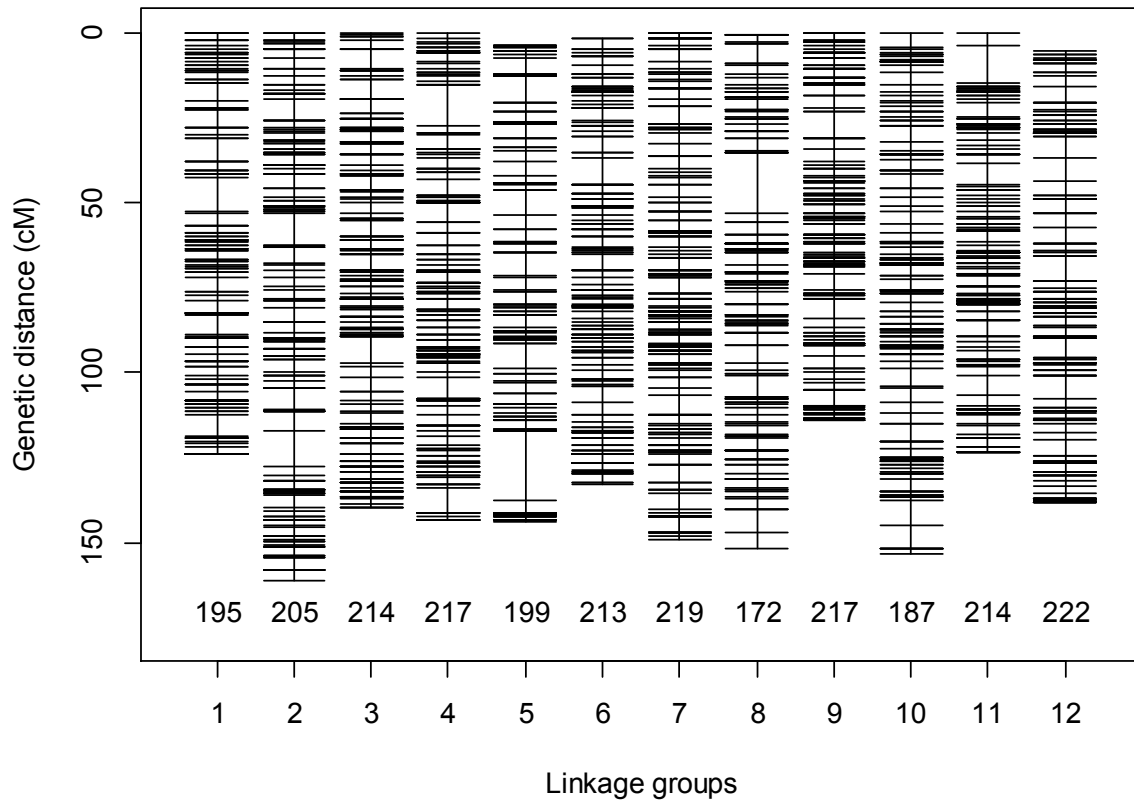

**S4 Fig. Genetic location of the markers used for association mapping on the composite linkage map of *Pinus pinaster* established by de Miguel *et al.* (2015). The number of markers per linkage group is indicated beneath each linkage group.**
