# Supplementary material for: Linkage and Association Mapping for Two Major Traits Used in the Maritime Pine Breeding Program: Height Growth and Stem Straightness
Source: PubMed Central journal article supplement (PMC5091878; doi:10.1371/journal.pone.0165323), 2016-11-02
Supplement: pone.0165323.s007.pdf [file pone.0165323.s007.pdf]

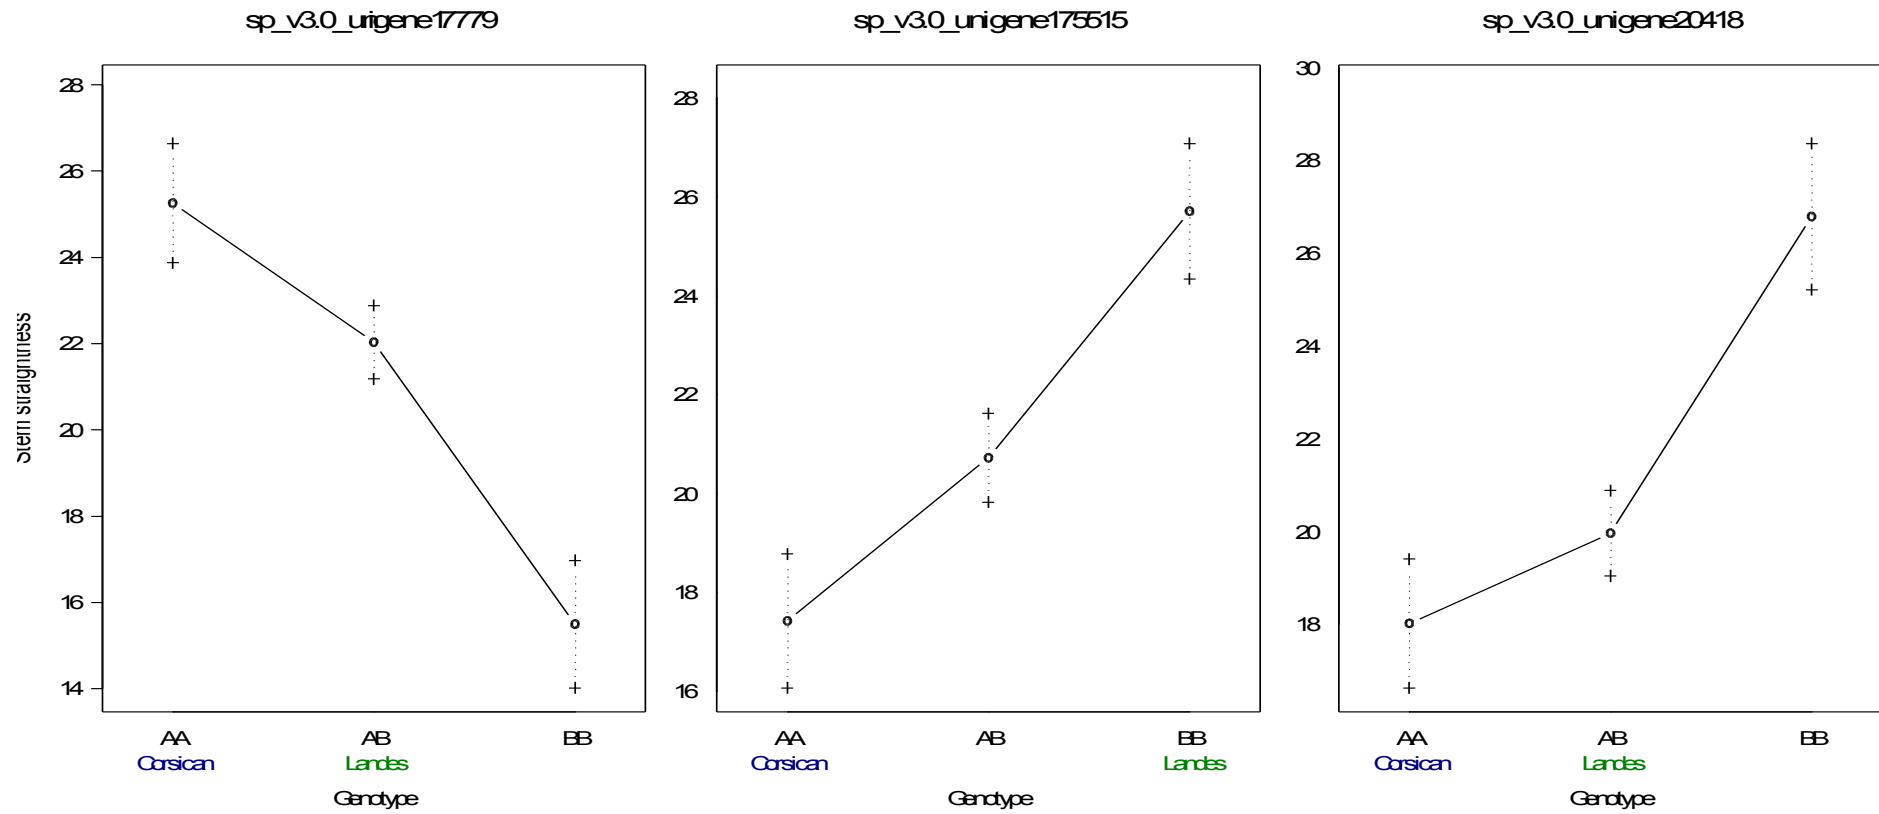

**S6 Fig.** Average stem straightness (estimated as the deviation from verticality) as a function of genotype at three QTL loci on chromosomes 7 (*sp\_v3.0\_unigene17779*), 11 (*sp\_v3.0\_unigene175515*) and 12 (*sp\_v3.0\_unigene20418*). The genotype of the grandparents (Landes or Corsican) is indicated below the corresponding class.
