# Supplementary material for: Linkage and Association Mapping for Two Major Traits Used in the Maritime Pine Breeding Program: Height Growth and Stem Straightness
Source: PubMed Central journal article supplement (PMC5091878; doi:10.1371/journal.pone.0165323), 2016-11-02
Supplement: pone.0165323.s008.pdf [file pone.0165323.s008.pdf]

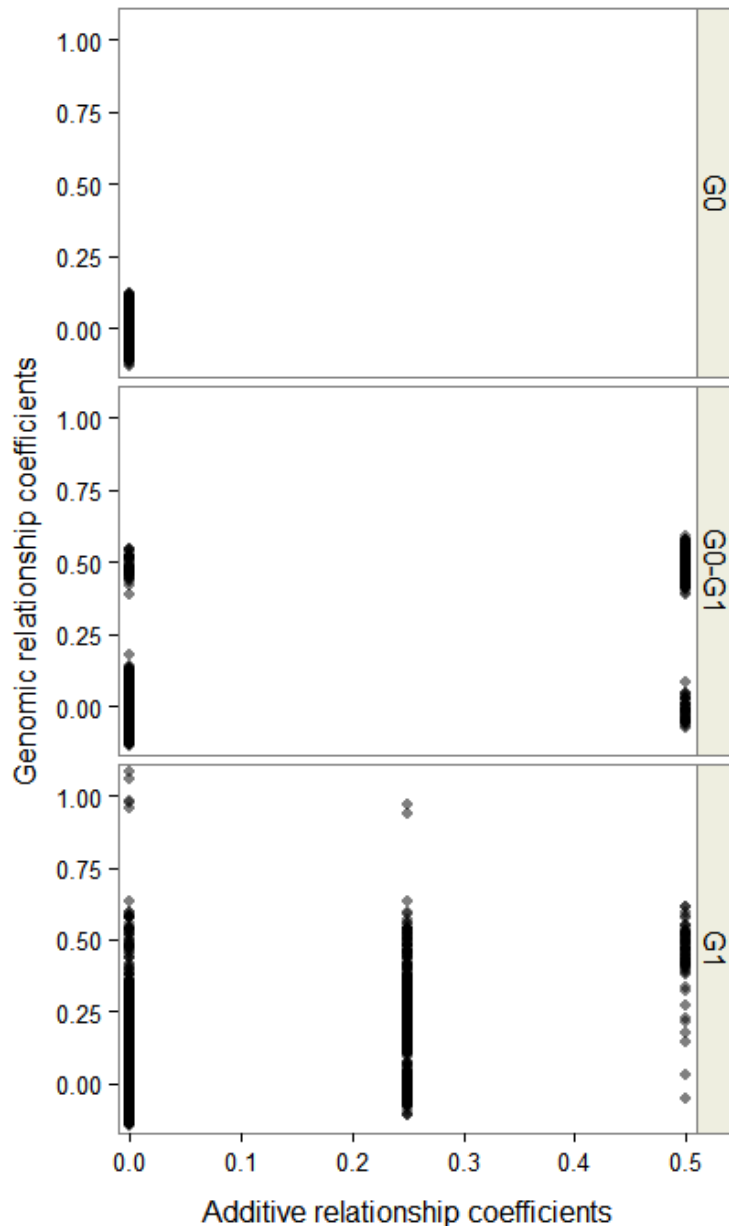

**S7 Fig. Scatterplot of additive relationship coefficients and genomic relationship coefficients within generations (G0 or G1) and between generations (G0-G1).** The 39 G1 and 9 G0 individuals presenting inconsistencies between pedigree-based and marker-based kinship were removed from the association analysis.
