# Supplementary material for: Linkage and Association Mapping for Two Major Traits Used in the Maritime Pine Breeding Program: Height Growth and Stem Straightness
Source: PubMed Central journal article supplement (PMC5091878; doi:10.1371/journal.pone.0165323), 2016-11-02
Supplement: pone.0165323.s009.pdf [file pone.0165323.s009.pdf]

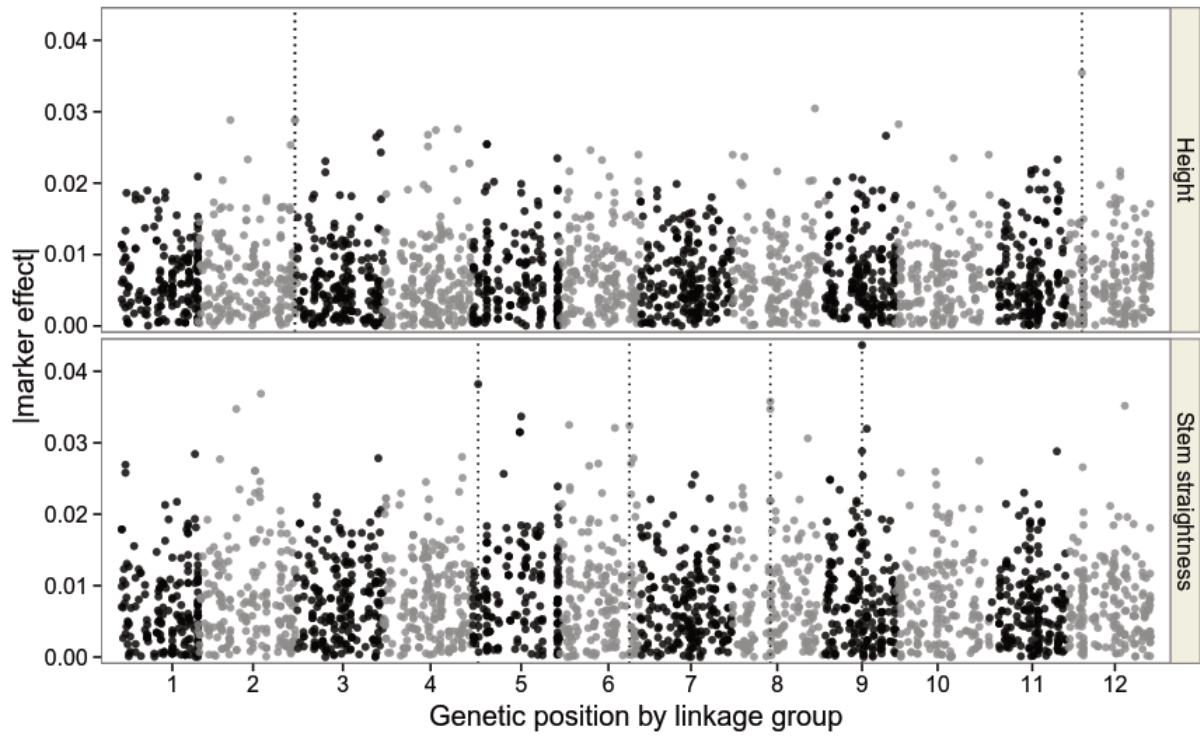

**S8 Fig. Single marker effects on total height and stem straightness, in ridge regression BLUP (RR-BLUP).** The absolute values of markers are plotted on the 12 linkage groups of the *Pinus pinaster* composite map.
