# Supplementary material for: Linkage and Association Mapping for Two Major Traits Used in the Maritime Pine Breeding Program: Height Growth and Stem Straightness
Source: PubMed Central journal article supplement (PMC5091878; doi:10.1371/journal.pone.0165323), 2016-11-02
Supplement: pone.0165323.s013.pdf [file pone.0165323.s013.pdf]

**S2 Table Descriptive statistics for the traits measured in the F2 and G2 mapping populations.**

For the F2 mapping population: stem straightness (STR) and height growth (HT) and for the G2 mapping population: annual height increment (HI) from 1985 to 1997.

| Mapping population | Trait    | Mean  | SD   | CV   | Min | Max | N   |
|--------------------|----------|-------|------|------|-----|-----|-----|
| F2                 | HT       | 574.4 | 88   | 0.15 | 330 | 820 | 477 |
|                    | STR      | 21.3  | 13.5 | 0.64 | 0   | 78  | 476 |
| G2                 | HI_85-86 | 34.2  | 13.9 | 0.41 | 8   | 80  | 193 |
|                    | HI_86-87 | 49.1  | 21.8 | 0.44 | 14  | 113 | 194 |
|                    | HI_87-88 | 68.6  | 30.1 | 0.44 | 15  | 145 | 197 |
|                    | HI_88-89 | 86.3  | 30.6 | 0.35 | 20  | 174 | 197 |
|                    | HI_89-90 | 73    | 21.2 | 0.29 | 23  | 146 | 197 |
|                    | HI_90-91 | 64.5  | 13.9 | 0.22 | 32  | 114 | 197 |
|                    | HI_91-92 | 83.1  | 17.1 | 0.21 | 30  | 140 | 197 |
|                    | HI_92-93 | 81.9  | 13.8 | 0.17 | 48  | 148 | 197 |
|                    | HI_93-94 | 79.2  | 13.5 | 0.17 | 29  | 117 | 197 |
|                    | HI_94-95 | 80.5  | 15.8 | 0.2  | 28  | 140 | 197 |
|                    | HI_95-96 | 75.7  | 15.6 | 0.21 | 29  | 119 | 197 |
|                    | HI_96-97 | 76.4  | 18.9 | 0.25 | 18  | 130 | 195 |
