# Supplementary material for: Linkage and Association Mapping for Two Major Traits Used in the Maritime Pine Breeding Program: Height Growth and Stem Straightness
Source: PubMed Central journal article supplement (PMC5091878; doi:10.1371/journal.pone.0165323), 2016-11-02
Supplement: pone.0165323.s014.pdf [file pone.0165323.s014.pdf]

**S3 Table Spearman correlations for height increment in the G2 mapping population.** Only significant correlations ( $p < 0.05$ ) are listed.

|          | HI_85-<br>86 | HI_86-<br>87 | HI_87-<br>88 | HI_88-<br>89 | HI_89-<br>90 | HI_90-<br>91 | HI_91-<br>92 | HI_92-<br>93 | HI_93-<br>94 | HI_94-<br>95 | HI_95-<br>96 |
|----------|--------------|--------------|--------------|--------------|--------------|--------------|--------------|--------------|--------------|--------------|--------------|
| HI_86-87 | 0.46         |              |              |              |              |              |              |              |              |              |              |
| HI_87-88 | 0.41         | 0.33         |              |              |              |              |              |              |              |              |              |
| HI_88-89 | 0.53         | 0.39         | 0.61         |              |              |              |              |              |              |              |              |
| HI_89-90 | 0.42         | 0.27         | 0.43         | 0.44         |              |              |              |              |              |              |              |
| HI_90-91 | 0.28         | 0.27         | 0.36         | 0.37         | 0.37         |              |              |              |              |              |              |
| HI_91-92 | 0.23         | 0.21         | 0.25         | 0.28         | 0.33         | 0.22         |              |              |              |              |              |
| HI_92-93 | 0.29         | 0.31         | 0.3          | 0.39         | 0.34         | 0.39         | 0.4          |              |              |              |              |
| HI_93-94 | 0.32         | 0.42         | 0.37         | 0.44         | 0.35         | 0.43         | 0.33         | 0.64         |              |              |              |
| HI_94-95 | 0.29         | 0.36         | 0.37         | 0.39         | 0.36         | 0.45         | 0.23         | 0.6          | 0.71         |              |              |
| HI_95-96 | 0.26         | 0.32         | 0.29         | 0.36         | 0.26         | 0.35         | 0.23         | 0.42         | 0.51         | 0.62         |              |
| HI_96-97 | -            | 0.2          | 0.3          | 0.36         | 0.29         | 0.36         | 0.24         | 0.41         | 0.48         | 0.55         | 0.56         |
