# Supplementary material for: Linkage and Association Mapping for Two Major Traits Used in the Maritime Pine Breeding Program: Height Growth and Stem Straightness
Source: PubMed Central journal article supplement (PMC5091878; doi:10.1371/journal.pone.0165323), 2016-11-02
Supplement: pone.0165323.s015.pdf [file pone.0165323.s015.pdf]

**S4 Table Statistics for the two VeraCode SNP arrays**

|         |                      | Number of SNPs | ADT score        | Number of SNPs |             |             |
|---------|----------------------|----------------|------------------|----------------|-------------|-------------|
|         |                      |                |                  | Polymorphic    | Monomorphic | Failed      |
| Array 1 | Already mapped SNP   | 97             | 0.89 [0.68–1]    | 87 (90%)       | 0           | 10 (10%)    |
|         | <i>In silico</i> SNP | 287            | 0.79 [0.65–0.99] | 39 (13.5%)     | 169 (59%)   | 79 (27.5%)  |
|         | Total                | 384            | 0.82 [0.65–1]    | 126 (32.8%)    | 169 (44%)   | 89 (23.2%)  |
| Array 2 | Already mapped SNP   | 82             | 0.8 [0.5–0.985]  | 56 (68%)       | 0           | 26 (32%)    |
|         | <i>In silico</i> SNP | 302            | 0.73 [0.5–0.99]  | 97 (32%)       | 30 (10%)    | 175 (58%)   |
|         | Total                | 384            | 0.74 [0.5–0.99]  | 153 (39.8%)    | 30 (7.8%)   | 201 (52.3%) |
