# Supplementary material for: Linkage and Association Mapping for Two Major Traits Used in the Maritime Pine Breeding Program: Height Growth and Stem Straightness
Source: PubMed Central journal article supplement (PMC5091878; doi:10.1371/journal.pone.0165323), 2016-11-02
Supplement: pone.0165323.s017.pdf [file pone.0165323.s017.pdf]

**S6 Table Current status of major international conifer genome sequencing projects.**

| Species                 | Genome size          | Type of material used for sequencing                                                     | Sequencing and assembly strategy                                                                                                 | Number of scaffolds & N50                                                                        | Number of gene models predicted                         |
|-------------------------|----------------------|------------------------------------------------------------------------------------------|----------------------------------------------------------------------------------------------------------------------------------|--------------------------------------------------------------------------------------------------|---------------------------------------------------------|
| <i>Pinus pinaster</i>   | 51-60 pg / 2C<br>[1] | DNA from a single haploid line generated by <i>in vitro</i> culture of a megagametophyte | Short reads sequencing (Illumina) + mate pair sequencing 454.<br>Assembly: MaSuRCA + SOAPdenovo2.                                | Scaffolds >500 bp: 4.4 millions<br>N50: ~920 bp<br>Assembly version 0.8.                         | -                                                       |
| <i>Picea abies</i>      | 40 pg / 2C<br>[2]    | DNA from haploid and diploid tissues of the same genotype                                | Haploid WGS combined with diploid fosmid pools and diploid WGS.<br>Short reads sequencing (Illumina)<br>Assembly: GAM-NGS, BESST | Scaffolds >500 bp: 10.2 millions<br>N50: ~600bp<br>Assembly version 1.0                          | 28,354                                                  |
| <i>Pinus taeda</i>      | 44 pg / 2C<br>[3,4]  | DNA from haploid and filtered diploid tissue of the same genotype.                       | Haploid WGS combined with filtered diploid WGS + short read sequencing PE and MP (Illumina)<br>Assembly: MaSuRCA                 | Scaffolds >500bp: 2.2 millions<br>N50: 76 Kbp<br>Assembly version 1.01                           | 9,024 (full-length)<br>32,432 (partial/<br>low quality) |
| <i>Picea glauca</i>     | 42 Gb / 2C<br>[5,6]  | DNA from diploid tissues                                                                 | WGS + short read sequencing PE and MP (Illumina)<br>Assembly: ABySS                                                              | Scaffolds >500bp: 4.9 millions<br>N50: 20.4 Kbp                                                  | 23,589 (full-length)                                    |
| <i>Pinus sylvestris</i> | 50-54pg / 2C         | DNA from haploid and diploid tissues from the same individual                            | Haploid combined with diploid WGS<br>Short read sequencing (Illumina)<br>Assembly: CLC                                           | Scaffolds >500bp: 6.5 millions<br>N50: 2245 bp                                                   | -                                                       |
| <i>Pinus sibirica</i>   | 60 pg / 2C<br>[7]    | DNA from haploid megagametophytes and diploid needle tissues of the same genotype        | Short read sequencing PE and MP 2× 100 sequencing (Illumina)<br>Assembly: CLC Assembly Cell, ABySS and MaSuRCA                   | Scaffolds: in progress<br>Contigs >500 bp: 9.9 millions<br>N50: ~3200 bp<br>Assembly version 0.9 | -                                                       |

1. Chagné D, Lalanne C, Madur D, Kumar S, Frigério J-M, et al. (2002) A high density genetic map of maritime pine based on AFLPs. *Ann For Sci* 59: 627-636.
2. Nystedt B, Street NR, Wetterbom A, Zuccolo A, Lin Y-C, et al. (2013) The Norway spruce genome sequence and conifer genome evolution. *Nature* 497: 579-584.
3. Wegrzyn JL, Liechty JD, Stevens KA, Wu L-S, Loopstra CA, et al. (2014) Unique Features of the Loblolly Pine (*Pinus taeda* L.) Megagenome Revealed Through Sequence Annotation. *Genetics* 196: 891-909.
4. Neale DB, Wegrzyn JL, Stevens KA, Zimin AV, Puiu D, et al. (2014) Decoding the massive genome of loblolly pine using haploid DNA and novel assembly strategies. *Genome Biology* 15: 1-13.
5. Warren RL, Keeling CI, Yuen MMS, Raymond A, Taylor GA, et al. (2015) Improved white spruce (*Picea glauca*) genome assemblies and annotation of large gene families of conifer terpenoid and phenolic defense metabolism. *The Plant Journal* 83: 189-212.
6. Birol I, Raymond A, Jackman SD, Pleasance S, Coope R, et al. (2013) Assembling the 20 Gb white spruce (*Picea glauca*) genome from whole-genome shotgun sequencing data. *Bioinformatics* 29.
7. Zonneveld BJM (2012) Conifer genome sizes of 172 species, covering 64 of 67 genera, range from 8 to 72 picogram. *Nordic Journal of Botany* 30: 490-502.
